# Supplementary material for: Motility enhancement of bacteria actuated microstructures using selective bacteria adhesion
Source: Royal Society of Chemistry journal article supplement (doi:10.1039/c000463d), 2010-01-01
Supplement: c000463d.pdf [file c000463d.pdf]

## Supplementary Information

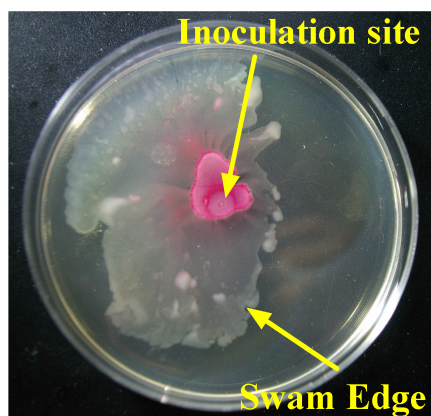

S. 1. Photograph of motile bacterial strain of *S. marcescens* showing a swarming colony on a swarm plate.

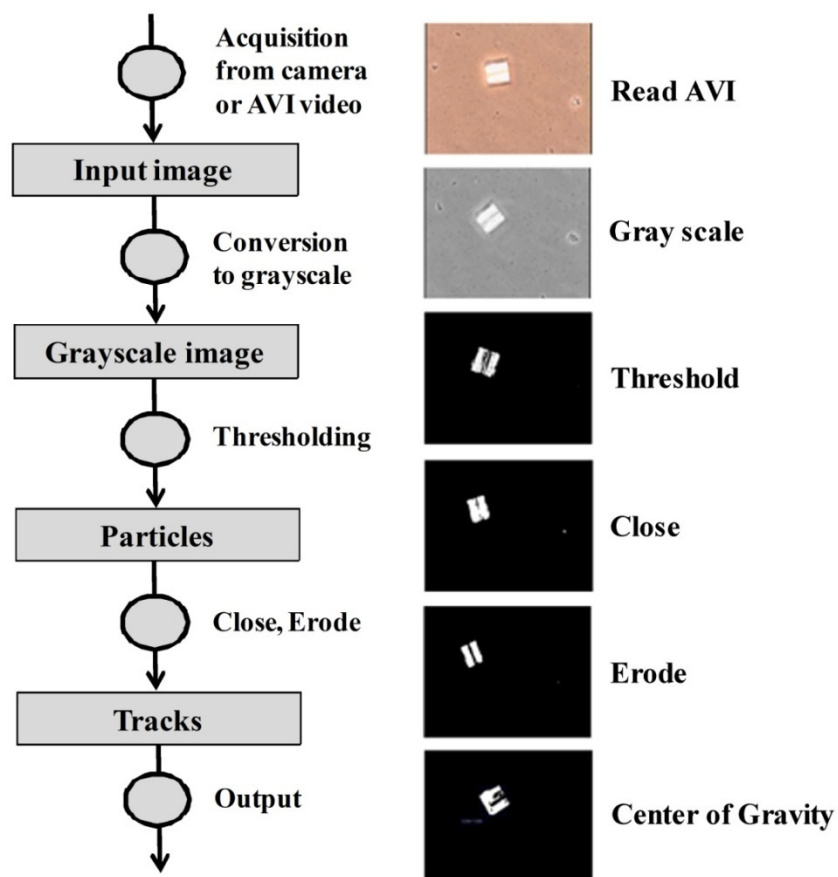

S. 2. Schematic diagrams for image analysis: a) Step of image processing with RoBo Realm, b) Process of images analysis—Structures tracking an individual video frame of  $30\ \mu\text{m} \times 30\ \mu\text{m} \times 30\ \mu\text{m}$  micro cube movement are captured.
